# Supplementary material
Source: Springer Nature journal article supplement (https://www.springermedizin.de/resource/supplementary/12968_2008_13_MOESM2_ESM.pdf/9577786)

Slice 6 of the  
motion-free  
SA image

Slice 6 of the  
misaligned  
SA image

Difference image of  
the motion-free and  
misaligned slice  
before registration

Difference image of  
the motion-free and  
misaligned slice  
after registration

Phase 1

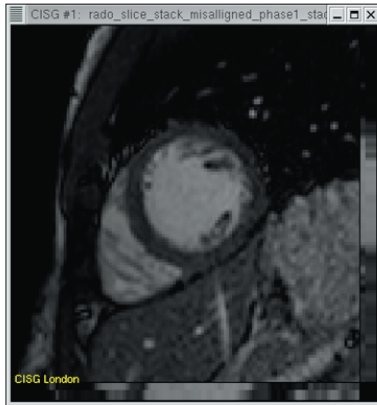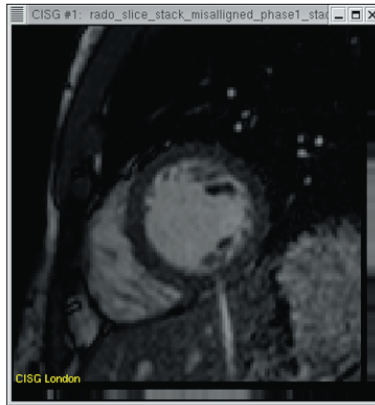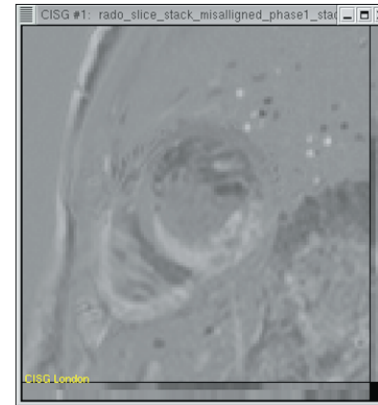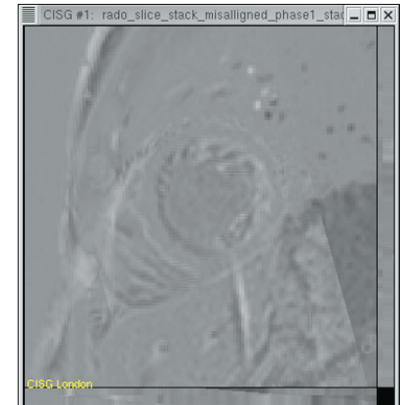

Phase 10

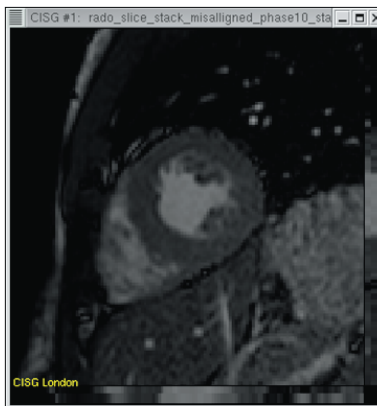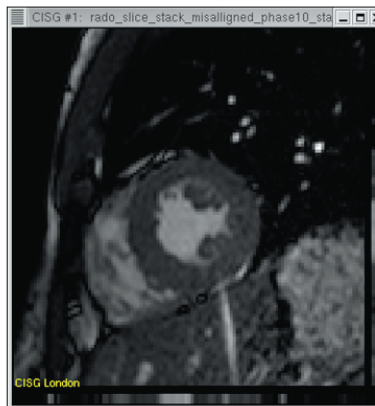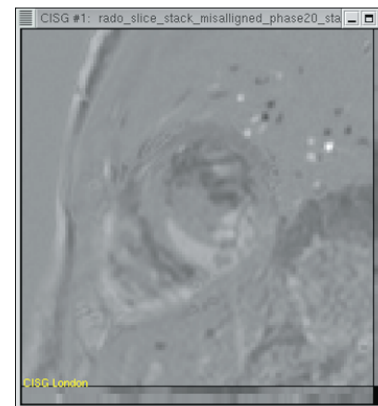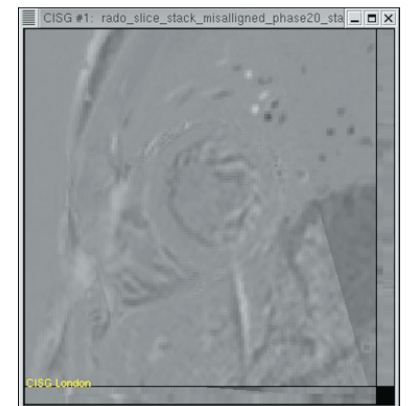

Phase 20

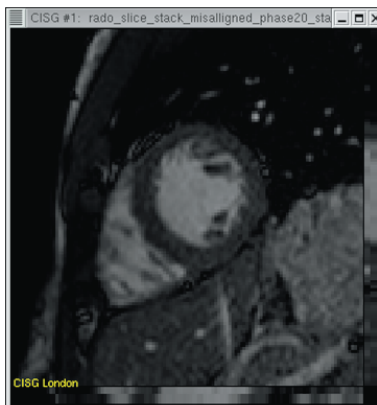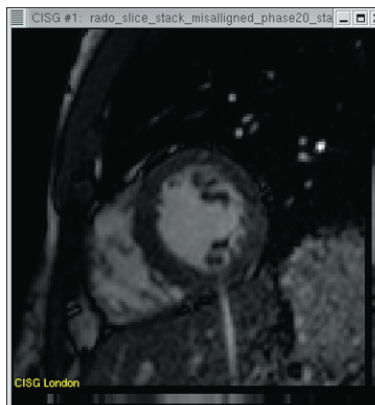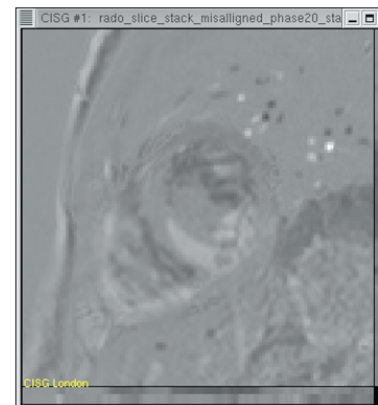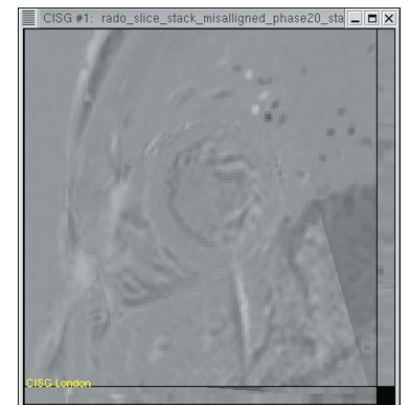

Supplement: MOESM2 [file 9577786]
